# Supplementary material for: Valorization of poly(butylene succinate) to tetrahydrofuran via one-pot catalytic hydrogenolysis
Source: Royal Society of Chemistry journal article supplement (doi:10.1039/d0re00441c), 2021-01-01
Supplement: d0re00441c1.pdf [file d0re00441c1.pdf]

1

2 **Supplementary Materials**

3

4 Valorization of poly(butylene succinate) to

5 Tetrahydrofuran *via* one-pot catalytic hydrogenolysis

6 Hang Zhang, Shimin Kan, Jinxia Fu, Yunbing He, Xiangxuan Huang, Jie Chang,

7 Yongjun Xu

8

9 **Contents**

10 **1. Experimental details**

11 1.1 Visualization reaction

12 1.2 Catalytic hydrogenolysis of succinic acid/ butanediol/amma-butyrolactone/succinic anhydride

13 1.3 Catalytic hydrogenolysis over other catalysts

14 1.4 Catalytic hydrogenolysis in water solution

15 1.5 Liquid products analysis

16 1.6 Gas analysis

17 1.7 Pyrolysis-GC-MS (Py-GC-MS) analysis

18 **Figure. S1-S8**

19

20

## 21 **1. Experimental details**

### 22 **1.1 Visualization reaction**

23 The tests were conducted in a 50 ml autoclave reactor with a transparent glass made of sapphire  
24 (SenLong Experimental Apparatus Co. Ltd., China). 1.5 g PBS and 0.15 g of Pd/C catalyst were  
25 mixed and loaded in the autoclave reactor. The reactor was: (1) sealed and flushed with H<sub>2</sub> three  
26 times, (2) pressurized with H<sub>2</sub> to 3.0 MPa at room temperature, and (3) heated up to the given  
27 temperature (i.e., 240 °C) in ~70 min and then hold for 36 h.

### 28 **1.2 Catalytic hydrogenation of succinic acid/ butanediol/ gamma-butyrolactone/succinic 29 anhydride**

30 The catalytic hydrogenation was performed in a 100 ml autoclave reactor with a mechanical stirrer  
31 and an electric temperature controller. Given amount of reactants, i.e. 5.9 g of succinic acid, or 4.5  
32 g of butanediol, or 4.3 g of gamma-butyrolactone, or 5.0 g succinic anhydride, was added into the  
33 reactor. The reactor was: (1) loaded with catalysts (mass ratio of catalyst: PBS=1:10) and purged  
34 with H<sub>2</sub> three times, (2) pressurized with H<sub>2</sub> to 6.0 MPa at room temperature, and (3) heated up to  
35 the given temperature (i.e., 240 °C) in ~70 min and then hold for 24 h.

### 36 **1.3 Catalytic hydrogenolysis over other catalysts**

37 Two types of Cu/Zn/Al catalysts (with mass ratios of 55:35:10 and 65:25:10, purchased from  
38 Sinopec Research Institute of Nanhua group, Nanjing, China) and Ru/C (containing 50 wt% H<sub>2</sub>O,  
39 Macklin Reagent, Shanghai, China) were also employed for the hydrogenolysis reaction. All the  
40 tests were conducted in a 100 ml autoclave reactor. The reaction was performed with 8.4 g PBS and  
41 0.84 g catalysts under 6.0 MPa H<sub>2</sub> pressure. The reactor was heating to the targeted temperature  
42 (i.e., 240 °C) in ~70 min and then hold for 36 h.

### 43 **1.4 Catalytic hydrogenolysis in water solution**

44 A given amount of deionized water was added into the 100 ml autoclave reactor as a solvent with  
45 4.3 g PBS and 0.43 g Pd/C catalyst. The reactor was flushed with H<sub>2</sub> three times and then pressurized  
46 with H<sub>2</sub> to 6.0 MPa at room temperature. The reactants were heated to 240 °C in ~70 min and then  
47 hold for 12 h with a stirring rate of 500 r/min.

### 48 **1.5 Liquid products analysis**

49 The liquid products were qualitatively analyzed using a gas chromatograph-mass spectrometer (GC-  
50 MS, Shimadzu, QP2020, Japan) with two capillary columns (DB-5MS or Rtx-5MS). The optimized  
51 chromatographic conditions were injector temperature of 280 °C, ion source temperature of 200 °C,  
52 interface temperature of 285°C with helium as the carrier gas. The oven temperature program was  
53 set at 40°C (2 min) – (10°C /min) – 280 °C (2 min). Quantitative analysis of the liquid products  
54 from hydrogenation was performed using a GC instrument equipped with a flame ionization detector  
55 (FID, Shimadzu, 2014C) and a WondaCap-FFAP column, with an internal standard method (lactic  
56 acid was used as internal standard). After the reaction, pre-weighed lactic acid was added into the  
57 reactor at room temperature and mixed homogeneously with the liquid products. The column  
58 temperature was increased from 40 °C (with 3 min holding-time) to 240 °C at a heating rate of  
59 10°C/min, using N<sub>2</sub> as the carrier gas. The injector and detector temperatures are 260 °C and 280  
60 °C, respectively.

#### 61 **1.6 Gas analysis**

62 After the reactor cooled down to room temperature, the pressure and volume of the gas products in  
63 the reactor were measured to calculate the total amount of the gas products formed. The amounts of  
64 alkanes, CO<sub>2</sub>, and H<sub>2</sub> were quantitatively determined using a multi-dimensional gas chromatography  
65 (Kechuang, GC2002, China) with a thermal conductivity detector (TCD).

#### 66 **1.7 Pyrolysis-GC-MS (Py-GC-MS) analysis**

67 0.5 g PBS sample was placed in the sample cup and felt into the pyrolyzer furnace (Frontier  
68 Laboratories Ltd, Fukushima, Japan). The pyrolysis temperature was set at 220 °C, and the GC oven  
69 temperature was programmed from 50 to 280 °C with a heating rate of 20 °C/min. The volatile  
70 organic compounds were separated in an Ultra-Alloy metal capillary column (UA+5) and analyzed  
71 by an MS detector (Shimadzu QP2010 Ultra, Japan).

72

73

74

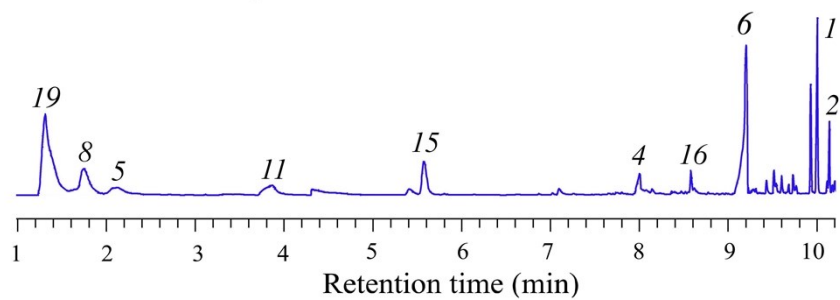

75 **Figure S1.** Py-GC-MS analysis of liquids from PBS pyrolysis at 220 °C under N<sub>2</sub> atmosphere: (1)  
76 butane succinate, (2) butylene succinate, (4) butanediol, (5) butenol, (6) succinic anhydride, (8)  
77 tetrahydrofuran, (11) propionic acid, (15) butyl propionate, (16) propyl propionate, (19) 1,3  
78 butadiene.

79

80

81

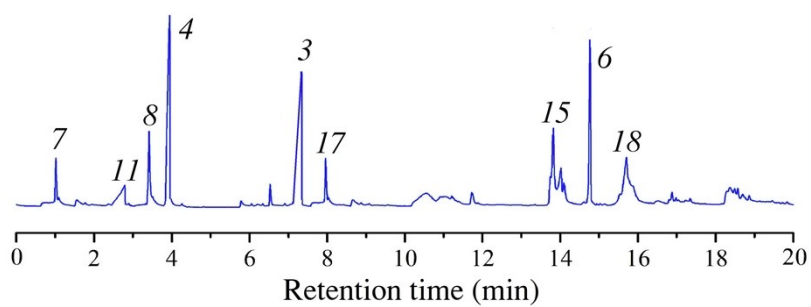

82 **Figure S2.** GC-MS analysis of oil products from catalyst-free pyrolysis of PBS under H<sub>2</sub>  
83 atmosphere (reaction at 240 °C for 12 h): (3) succinic acid, (4) butanediol, (6) succinic anhydride,  
84 (7) gamma-butyrolactone, (8) tetrahydrofuran, (11) propionic acid, (15) propyl propionate, (17)  
85 propyl butyrate, (18) butyl butyrate.

86

87

88

89  
90  
91

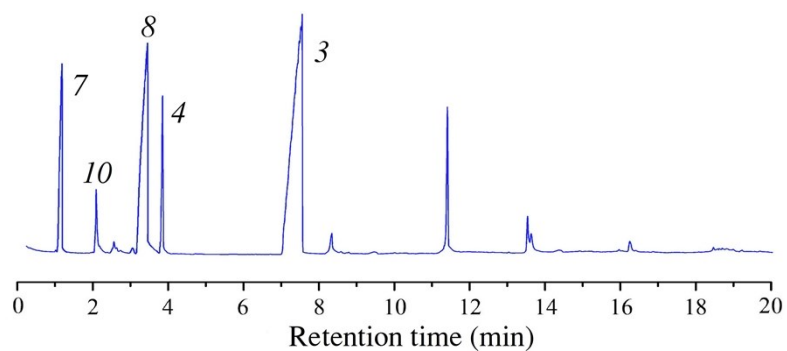

92

93 **Figure S3.** GC-MS analysis of oil products from catalyst-free hydrolysis of PBS at 240 °C for 12 h  
94 with 5% water dosage under H<sub>2</sub> atmosphere: (3) succinic acid, (4) butanediol, (7) gamma-  
95 butyrolactone, (8) tetrahydrofuran, (10) butanol.

96  
97  
98

99

100

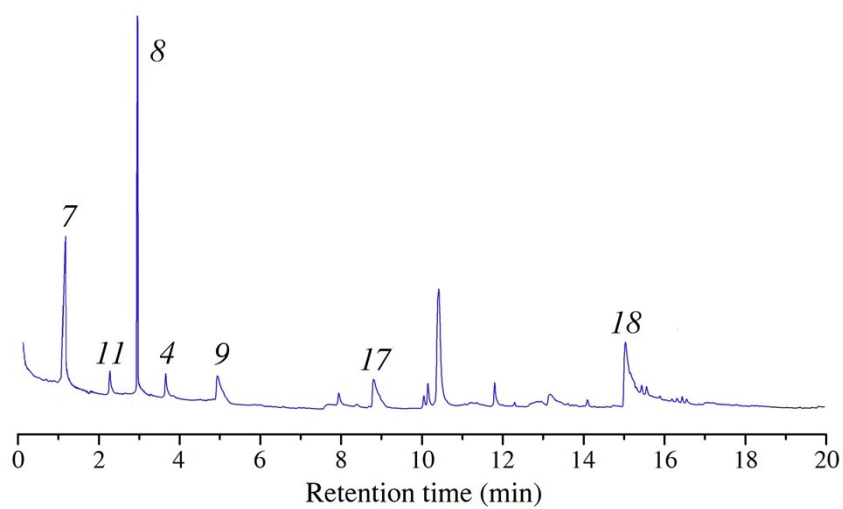

101

102 **Figure S4.** GC-MS analysis of oil products from catalytic hydrogenolysis of SA over Pd/C at 240

103 °C for 24 h: (4) butanediol, (7) gamma-butyrolactone, (8) tetrahydrofuran, (9) butyric acid, (11)

104 propionic acid, (17) propyl butyrate, (18) butyl butanoate.

105

106

107

108

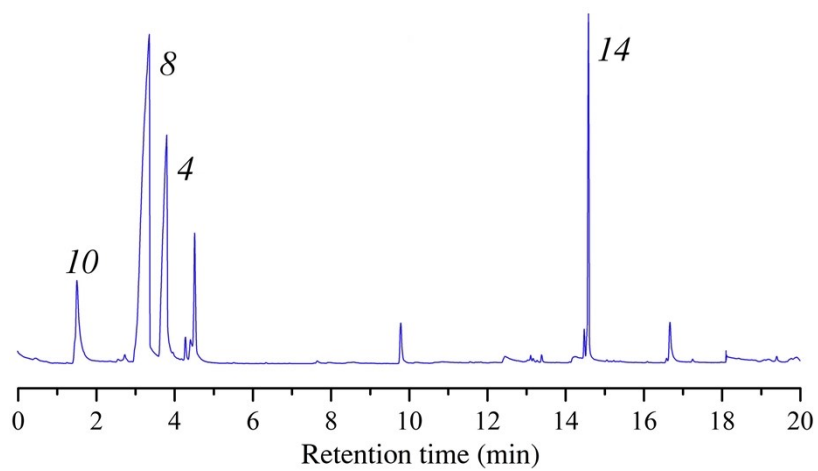

109 **Figure S5.** GC-MS analysis of oil products from catalytic hydrogenolysis of BDO over Pd/C at 240

110 °C for 24 h: (4) butanediol, (8) tetrahydrofuran, (10) butanol, (14) n-butyl ether.

111

112



113  
114  
115

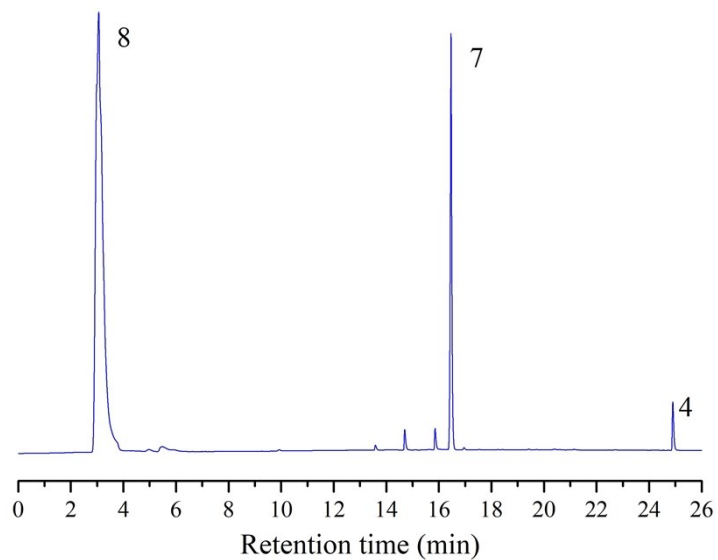

116 **Figure S6.** GC-FID analysis of oil products from catalytic hydrogenolysis of SAH over Pd/C at 240  
117 °C for 24 h: (4) butanediol, (7) gamma-butyrolactone, (8) tetrahydrofuran.

118  
119

120

121

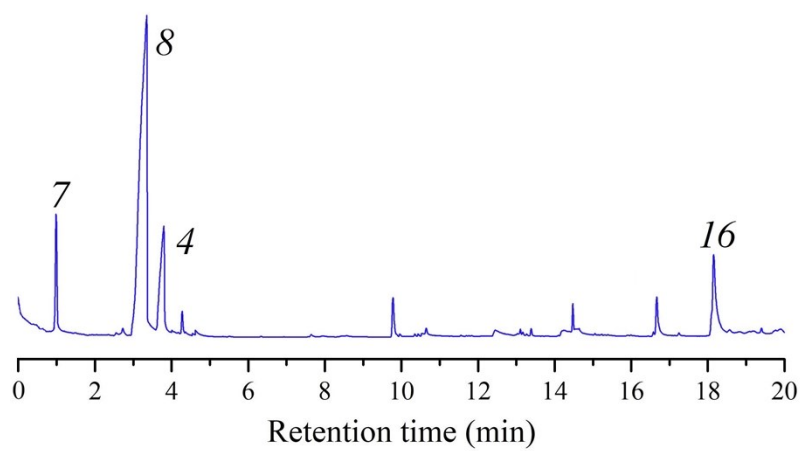

122 **Figure S7.** GC-MS analysis of oil products from catalytic hydrogenolysis of GBL over Pd/C at 240  
123 °C for 24 h: (4) butanediol, (7) gamma-butyrolactone, (8) tetrahydrofuran, (16) propyl proionate.

124

125

126

127

128

129

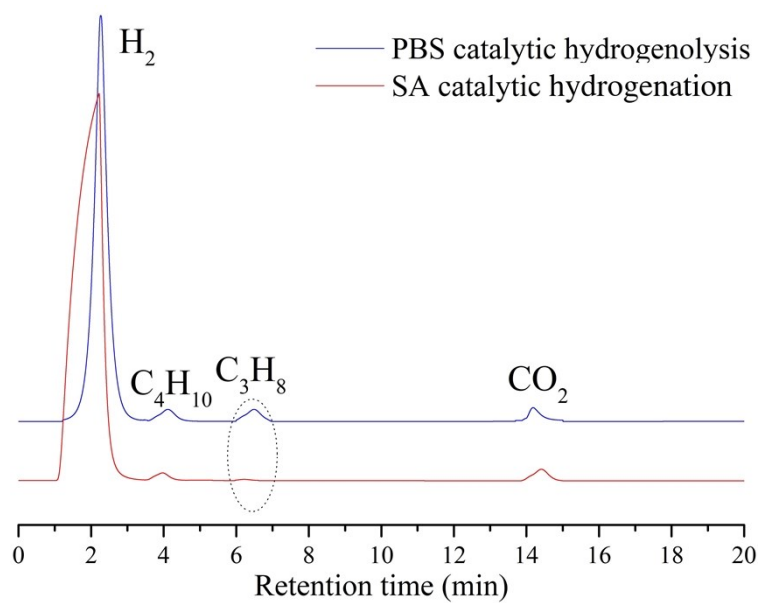

130

131 **Figure S8.** GC-TCD analysis of gases from hydrogenolysis of PBS and SA over Pd/C under 240

132 °C for 12 h.

133

134

135

136

137
